# Supplementary material for: Genomic mid-range inhomogeneity correlates with an abundance of RNA secondary structures
Source: PubMed Central journal article supplement (PMC2442090; doi:10.1186/1471-2164-9-284), 2008-06-12

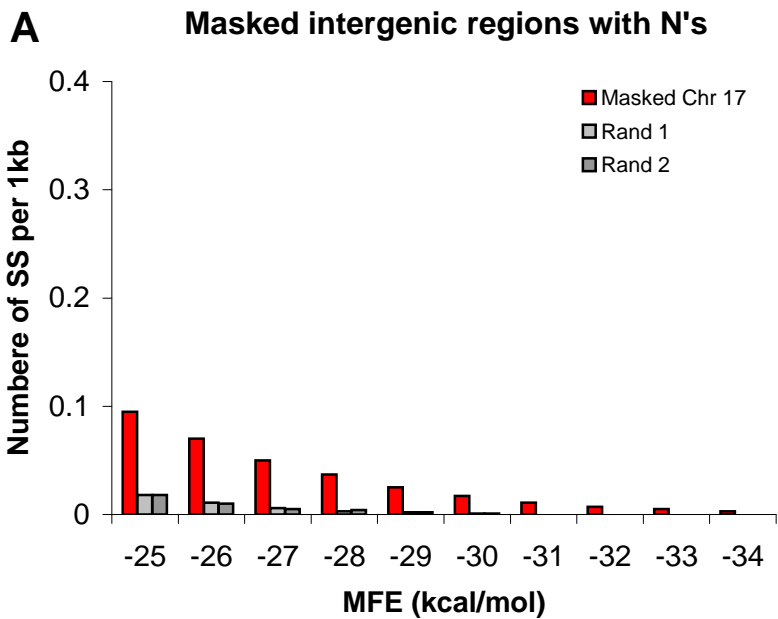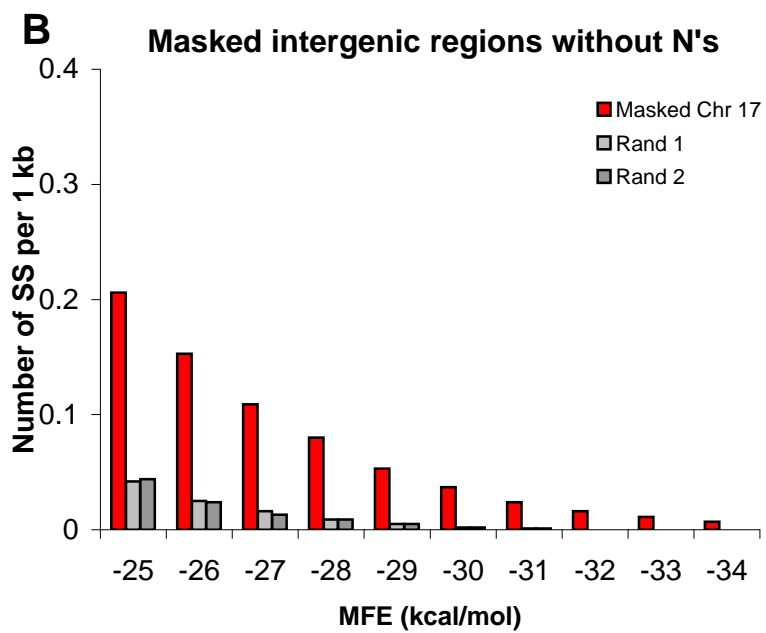

Supplement: 1471-2164-9-284-S3.pdf [file 1471-2164-9-284-S3.pdf]
